# Supplementary material
Source: PubMed Central journal article supplement (PMC2993080)
Supplement: NIHMS243912-supplement-02.pdf [file NIHMS243912-supplement-02.pdf]

## Table S2

| <b>Gene</b>     | <b>Description</b>                                                                 |
|-----------------|------------------------------------------------------------------------------------|
| <i>Atm</i>      | Ataxia telangiectasia mutated homolog (human)                                      |
| <i>Cbfb</i>     | Core binding factor beta                                                           |
| <i>Cux1</i>     | Cut-like homeobox 1                                                                |
| <i>Dnapkcs</i>  | DNA-dependent protein kinase catalytic subunit                                     |
| <i>Exo1</i>     | Exonuclease 1                                                                      |
| <i>Gadd45a</i>  | Growth arrest and DNA-damage-inducible 45 alpha                                    |
| <i>Gadd45b</i>  | Growth arrest and DNA-damage-inducible 45 beta                                     |
| <i>Ikzf1</i>    | IKAROS family zinc finger 1                                                        |
| <i>Irf4</i>     | Interferon regulatory factor 4                                                     |
| <i>Jak1</i>     | Janus kinase 1                                                                     |
| <i>Map3k14</i>  | Mitogen-activated protein kinase kinase kinase 14                                  |
| <i>Mapk9</i>    | Mitogen-activated protein kinase 9                                                 |
| <i>Mapkapk2</i> | MAP kinase-activated protein kinase 2                                              |
| <i>Mre11a</i>   | Meiotic recombination 11 homolog A ( <i>S. cerevisiae</i> )                        |
| <i>Msh3</i>     | MutS homolog 3                                                                     |
| <i>Msh6</i>     | MutS homolog 6                                                                     |
| <i>Nfkb1</i>    | Nuclear factor of kappa light polypeptide gene enhancer in B-cells 1, p105         |
| <i>Nfkbiz</i>   | Nuclear factor of kappa light polypeptide gene enhancer in B-cells inhibitor, zeta |
| <i>Nfrkb</i>    | Nuclear factor related to kappa B binding protein                                  |
| <i>Parp2</i>    | Poly (ADP-ribose) polymerase family, member 2                                      |
| <i>Pole</i>     | Polymerase (DNA directed), epsilon                                                 |
| <i>Rel</i>      | Reticuloendotheliosis oncogene                                                     |
| <i>Rpa1</i>     | Replication protein A1                                                             |
| <i>Runx1</i>    | Runt related transcription factor 1                                                |
| <i>Runx3</i>    | Runt related transcription factor 3                                                |
| <i>Smad4</i>    | MAD homolog 4 ( <i>Drosophila</i> )                                                |
| <i>Tgfr1</i>    | Transforming growth factor, beta receptor I                                        |
| <i>Thoc5</i>    | THO complex 5                                                                      |
