# Supplementary material
Source: PubMed Central journal article supplement (PMC2993080)
Supplement: NIHMS243912-supplement-05.pdf [file NIHMS243912-supplement-05.pdf]

# Table S7

|                   | Forward Primer (5' to 3') | Reverse primer (5' to 3')     |
|-------------------|---------------------------|-------------------------------|
| <b>Q-PCR</b>      |                           |                               |
| AID               | GAAAGTCACGCTGGAGACCG      | TTCATGCCGTCCCTTGG             |
| $\alpha$ GLT      | GACATGATCACAGGCACAGG      | TTCCCCAGGTCACATTCATCGT        |
| GAPDH             | TGAAGCAGGCATCTGAGGG       | CGAAGGTGGAAGAGTGGGAG          |
| $\mu$ GLT         | TAGTAAGCGAGGCTCTAAAAAGCAT | AGAACAGTCCAGTGTAGGCAGTAGA     |
| Spt5              | TCTGCTCAGAGACAGCCTCA      | AAGCGGTTGCCTTCTTCTG           |
| <b>Sequencing</b> |                           |                               |
| 1110020P15Rik     | AGGTCAGCCACATGGTCTAAG     | CATAAAGCAGGGCGCGTT            |
| Actb              | CTTCCGGACAACGGCCCC        | AGCGACGCGGAGCCAATCA           |
| B2M               | AAGAAGCTCACAAGGTCCTCAGC   | AAGAAGCTCACAAGGTCCTCAGC       |
| Eef1g             | GCAGGATCGTCCAGAGTTATAC    | CAAAGTCCCCTCAGAATCGA          |
| Eif3i             | ACCCCACTTTGTCAACAGCT      | CCGGAAGTCGTCCCTAGTCT          |
| Gas5              | GCCAGAGGGAAAGTTTTGTGG     | ATTCCACCCCGTTGAACCGT          |
| H3f3b             | TTCTGGTAACGACGGATCTCTCT   | AAAGCTCCCGCCAATCGA            |
| Hnrnpa2b1         | AGGACGCTGAAGACCCAAGC      | GCCATTGGCGGCGGTTAG            |
| Laptm5            | AAGTGAGGCAGGCAGCCTGTG     | CACAGGTTCTGTCTGAGTCACTGA      |
| Mif               | CCAGGACTCAAGCGAAGGT       | ACAGCAAGACCTCTGCAGAAG         |
| Ncl               | CGAACGCGCCCGGGATTGCGC     | CTGGGCCCAAACGAGTCCCGC         |
| Psm2              | GAGCCAT ATTCGCCGCGGA      | ACAGAAAGGTGGCCCTGAGCA         |
| Psm4              | GAG CCA TAT TCG CCG CGG A | ACA GAA AGG TGG CCC TGA GCA   |
| Rexo1             | CAATACTTCCTACACACTGCCTG   | ACATTGTAAGCAGGCGCACT          |
| Rpl3              | ACCCTCGAATTAAGCACAAAA     | CGTCGACGAGG CGTTTCGCTA        |
| Rps12             | CTATGCTGGAATGCAGA CAGA    | CGCTGCGATGCCTGCTAGAAA         |
| Tmsb4x            | CTTAAAAAGGAGCCAAGGTGC     | GCGAAGGAGTTAAGCCGGACT         |
| S $\mu$           | GACCCAGGCTAAGAAGGCAATC    | GCGGCCCGGCTCATTCCAGTTCATTACAG |
