# Supplementary material
Source: PubMed Central journal article supplement (PMC2993080)
Supplement: NIHMS243912-supplement-06.pdf [file NIHMS243912-supplement-06.pdf]

# Figure S1

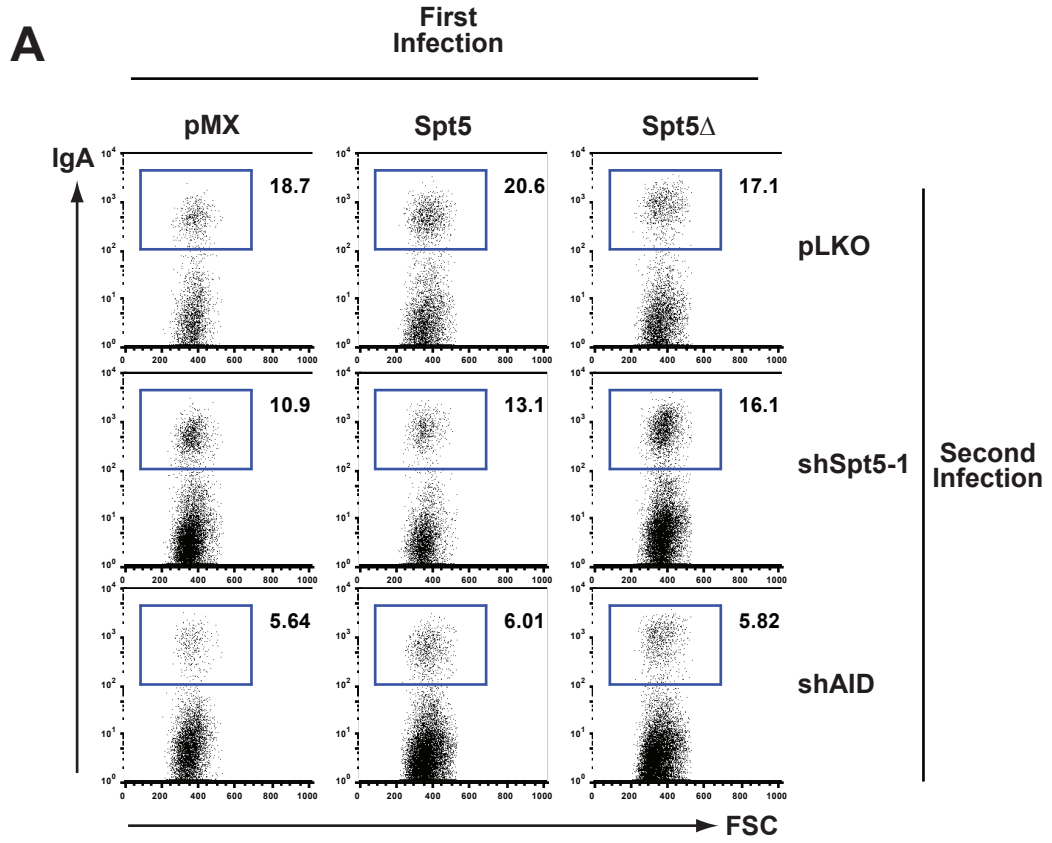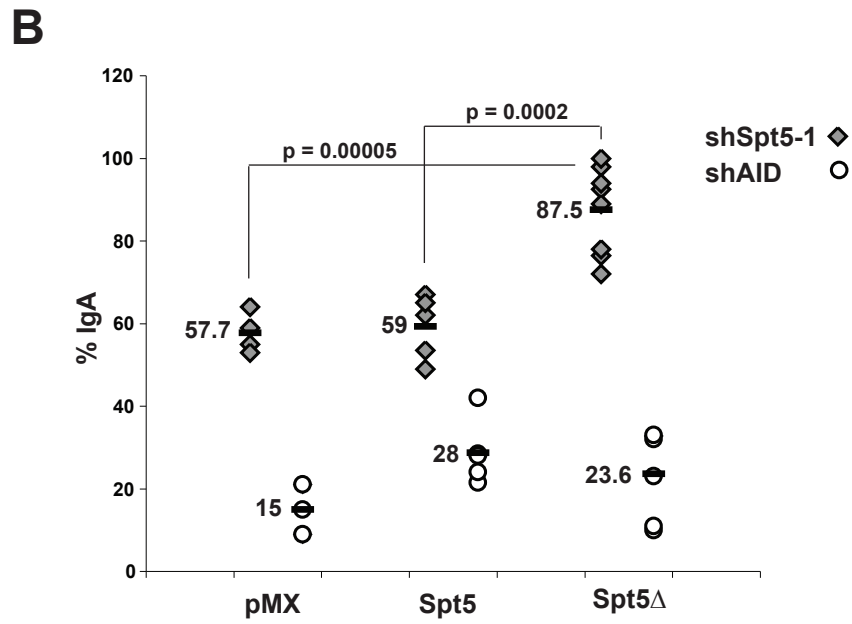

## Figure S2

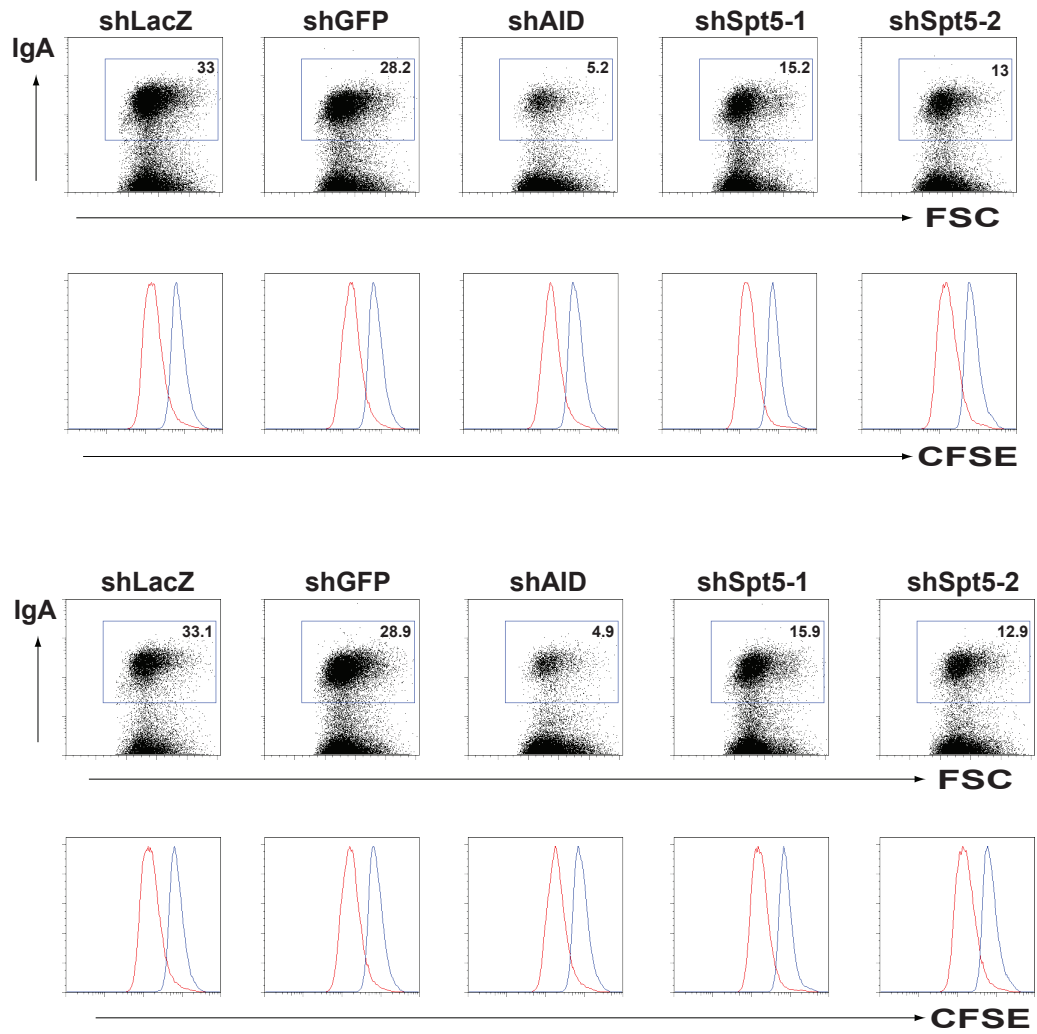

# Figure S3

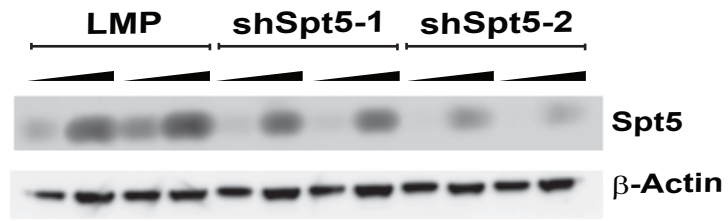

## Figure S4

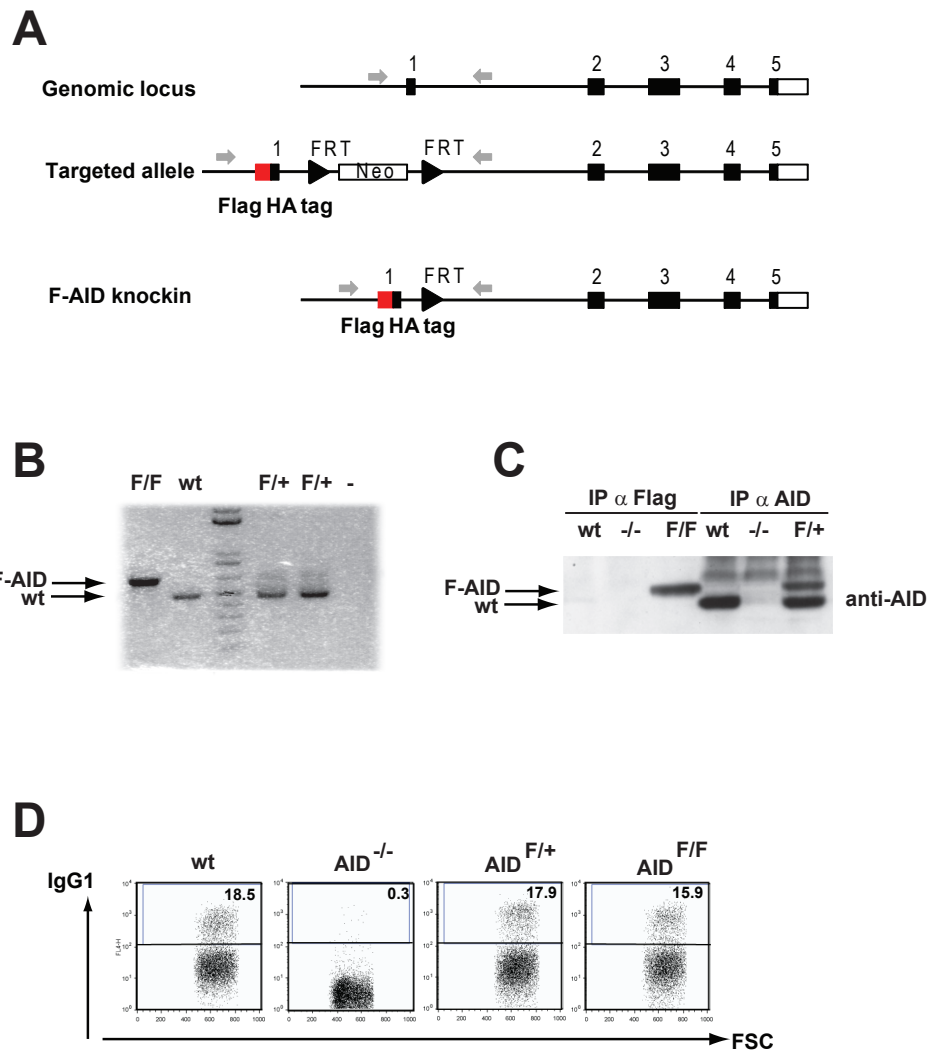

## Figure S5

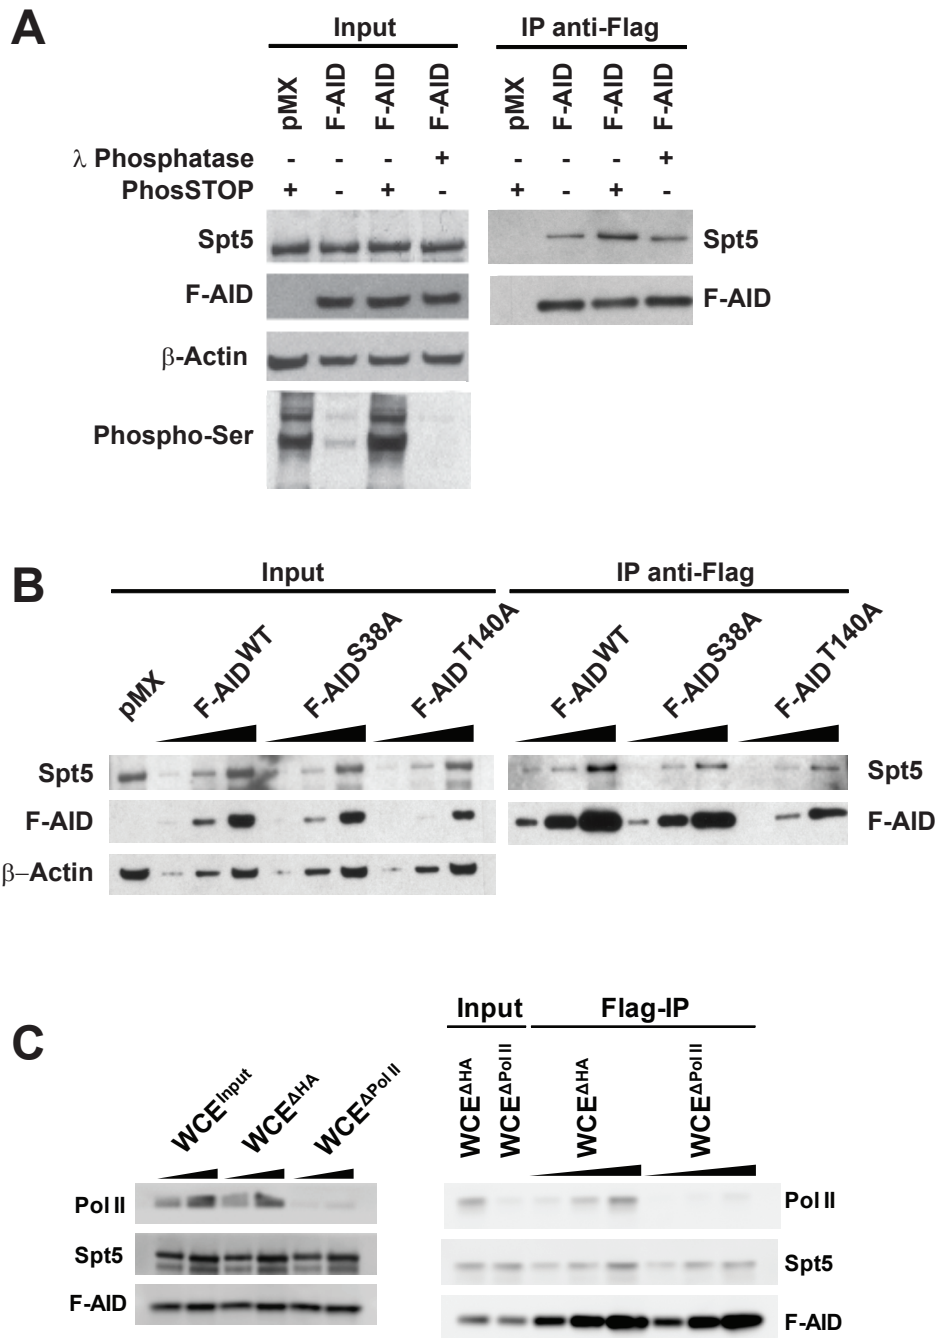

## Figure S6

Summary of mutation analysis on Spt5<sup>hi</sup> and Spt5<sup>lo</sup> genes from *Ig κ*AID and AID<sup>-/-</sup> B cells, as shown in Figure 6A, represented as unique mutations/nucleotides analyzed. P values were calculated by the Student's T test.

|                    |                          |                      |              |               |              |                  |               |              |              |              |               |
|--------------------|--------------------------|----------------------|--------------|---------------|--------------|------------------|---------------|--------------|--------------|--------------|---------------|
| Spt5 <sup>hi</sup> |                          | <b>Actb</b>          | <b>B2M</b>   | <b>Gas5</b>   | <b>H3f3b</b> | <b>Hnrnpa2b1</b> | <b>miR142</b> | <b>Ncl</b>   | <b>Rpl3</b>  | <b>Rps12</b> | <b>Tmsb4x</b> |
|                    | <b>AID<sup>-/-</sup></b> | 0/52500              | 2/78000      | 6/131733      | 0/56700      | 6/43860          | 6/45258       | 10/136409    | 3/81524      | 4/80306      | 0/43850       |
|                    | <b><i>Ig κ</i>AID</b>    | 7/27750              | 14/76234     | 28/129883     | 5/58500      | 28/66220         | 29/49336      | 38/144387    | 16/87478     | 15/84370     | 9/54940       |
|                    | <b>p value</b>           | 0.006                | 0.002        | 0.0003        | 0.02         | 0.0008           | 0.001         | 0.004        | 0.005        | 0.009        | 0.002         |
| Spt5 <sup>lo</sup> |                          | <b>1110020P15Rik</b> | <b>Eif3i</b> | <b>Laptn5</b> | <b>Mif</b>   | <b>Psma2</b>     | <b>Psma4</b>  | <b>Rexo1</b> | <b>Eef1g</b> |              |               |
|                    | <b>AID<sup>-/-</sup></b> | 3/103492             | 3/49600      | 1/39000       | 4/68800      | 1/49500          | 3/71930       | 2/31000      | 6/64500      |              |               |
|                    | <b><i>Ig κ</i>AID</b>    | 10/104513            | 5/50400      | 0/27600       | 7/63200      | 1/52250          | 6/76080       | 1/27280      | 10/48600     |              |               |
|                    | <b>p value</b>           | 0.101                | 0.78         | 0.32          | 0.31         | 0.98             | 0.65          | 0.93         | 0.08         |              |               |
